# Supplementary material
Source: publisher figshare collection journal article supplement (https://tandf.figshare.com/ndownloader/files/14791211)
Supplement: Supplementary file 1 [file 14791211]

**Supplemental Table 1 Association of rs17249754 and rs1401982 with large artery stenosis markers**

|  | rs17249754 | | | | | rs1401982 | | | | |
| --- | --- | --- | --- | --- | --- | --- | --- | --- | --- | --- |
|  | AA/AG | GG | p1 | p2 | p3 | GG/GA | AA | p1 | p2 | p3 |
| Homocysteine >= 15mmol/L | 132(25.7) | 123(32.9) | 0.020 | 0.057 | 0.062 | 148(27.4) | 107(30.8) | 0.288 | 0.372 | 0.352 |
| LDL >= 3.12mmol/L* | 185(38.5) | 153(44.2) | 0.152 | 0.073 | 0.090 | 195(38.6) | 143(44.4) | 0.111 | 0.099 | 0.119 |
| Fasting glucose >= 6.1mmol/L* | 25(5.8) | 36(11.0) | 0.010 | 0.012 | 0.013 | 29(6.3) | 32(10.6) | 0.040 | 0.045 | 0.039 |

LDL denotes low-density lipoprotein.

* We only included patients who were not taking lipid lowering medication (n=829, 92.2%) or diabetes drug (n=765, 85.1%) in the analyses.

p1: Fisher-exact p values without adjustment for additional variable.

p2: adjusted for age and sex.

p3: adjusted for age, sex, BMI, SBP, DBP, hypertension treatment, hypertension duration, diabetes, HDL, LDL, history of smoking and drinking, family history of cardiovascular diseases. LDL/diabetes was not adjusted in the analysis of LDL/Fasting glucose.

Upper normal ranges of homocysteine and LDL were determined from laboratory test kits. Impaired glucose tolerance was determined from *Chinese guidelines for the prevention and treatment of type 2 diabetes*.
